# Supplementary material for: Rejection of Unfair Offers Can Be Driven by Negative Emotions, Evidence from Modified Ultimatum Games with Anonymity
Source: PLOS journal article supplement (doi:10.1371/journal.pone.0039619), 2012-06-28
Supplement: S3 (10.1371/journal.pone.0039619.s003) [file journal.pone.0039619.s003]

**Supporting Text S3, Statistic results of rejection rates in questionnaire paradigm**

For each of 9 proposals in questionnaire paradigm,  $\chi^2$  –tests were performed between the rejection-rate pairs in (1) informed IG in experimenter condition, (2) non-informed IG in the experimenter condition, (3) informed IG in the anonymous condition, (4) non-informed IG in the anonymous condition, and between each rejection rate and zero. As shown in SI 3.1 to SI 3.10 (Significantly difference at  $p < 0.05$  level were shown in **Bold**).

For 9:1, 8:2, 7:3 proposals, the rejection rate in non-informed IG in anonymous condition (a) were significantly (with one exception at 0.080 level) lower than those in informed IG in the anonymous condition, and the informed IG and non-informed IG in the experimenter condition, and (b) significantly larger than zero.

**Figure S3.1, Rejection rates in questionnaire paradigm**

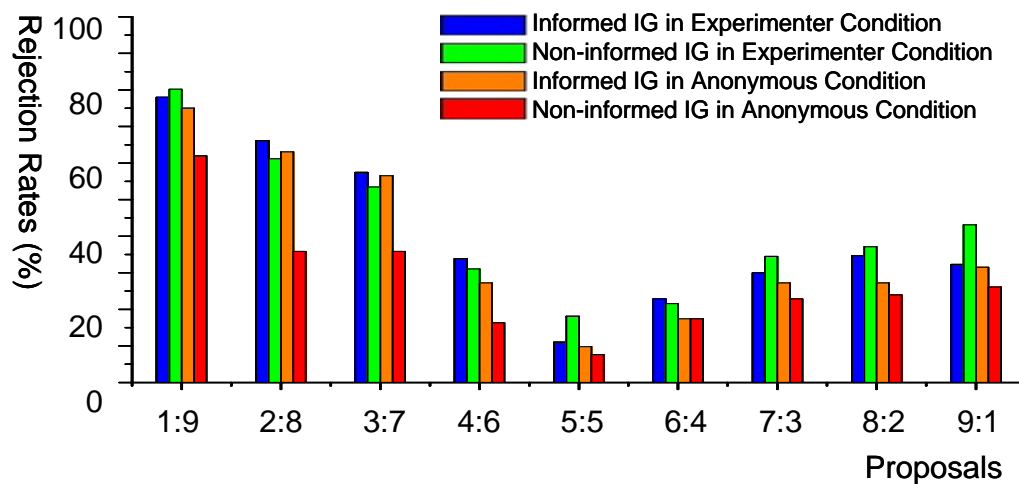

**Table S3.1, 9:1 proposal**

| Proposer, <b>9 yuan</b>                        | <b>Experimenter condition</b> |                 |                            |                 | <b>Anonymous condition</b> |                 |                            |                 |
|------------------------------------------------|-------------------------------|-----------------|----------------------------|-----------------|----------------------------|-----------------|----------------------------|-----------------|
| Responder, <b>1 yuan</b>                       | Informed IG                   |                 | Non-informed IG            |                 | Informed IG                |                 | Non-informed IG            |                 |
| Total number of participants                   | 127                           |                 | 116                        |                 | 92                         |                 | 92                         |                 |
| No. and % of participants who reject the offer | 99<br>78.0%                   |                 | 93<br>80.2%                |                 | 69<br>75.0%                |                 | 57<br>62.0%                |                 |
| <b><math>\chi^2</math> -test</b>               | <b><math>\chi^2</math></b>    | <b><i>p</i></b> | <b><math>\chi^2</math></b> | <b><i>p</i></b> | <b><math>\chi^2</math></b> | <b><i>p</i></b> | <b><math>\chi^2</math></b> | <b><i>p</i></b> |
| <b>Experimenter condition</b>                  |                               |                 |                            |                 |                            |                 |                            |                 |
| Informed IG, 78.0%                             | -                             | -               | 0.180                      | 0.753           | 0.260                      | 0.630           | <b>6.662</b>               | <b>0.015</b>    |
| Non-informed IG, 80.2%                         |                               |                 | -                          | -               | 0.797                      | 0.403           | <b>8.466</b>               | <b>0.004</b>    |
| <b>Anonymous condition</b>                     |                               |                 |                            |                 |                            |                 |                            |                 |
| Informed IG, 75.0%                             |                               |                 |                            |                 | -                          | -               | 3.626                      | 0.080           |
| Non-informed IG, 62.0%                         |                               |                 |                            |                 |                            |                 | -                          | -               |
| <b>Zero</b>                                    | <b>162.2</b>                  | <b>&lt;.001</b> | <b>155.2</b>               | <b>&lt;.001</b> | <b>110.4</b>               | <b>&lt;.001</b> | <b>82.58</b>               | <b>&lt;.001</b> |

**Table S3.2, 8:2 proposal**

| Proposer, <b>8 yuan</b>                        | <b>Experimenter condition</b> |                 |                            |                 | <b>Anonymous condition</b> |                 |                            |                   |
|------------------------------------------------|-------------------------------|-----------------|----------------------------|-----------------|----------------------------|-----------------|----------------------------|-------------------|
| Responder, <b>2 yuan</b>                       | Informed IG                   |                 | Non-informed IG            |                 | Informed IG                |                 | Non-informed IG            |                   |
| Total number of participants                   | 127                           |                 | 116                        |                 | 92                         |                 | 92                         |                   |
| No. and % of participants who reject the offer | 84<br>66.1%                   |                 | 71<br>61.2%                |                 | 58<br>63.0%                |                 | 33<br>35.9%                |                   |
| <b><math>\chi^2</math> -test</b>               | <b><math>\chi^2</math></b>    | <b><i>p</i></b> | <b><math>\chi^2</math></b> | <b><i>p</i></b> | <b><math>\chi^2</math></b> | <b><i>p</i></b> | <b><math>\chi^2</math></b> | <b><i>p</i></b>   |
| <b>Experimenter condition</b>                  |                               |                 |                            |                 |                            |                 |                            |                   |
| Informed IG, 66.1%                             | -                             | -               | 0.639                      | 0.504           | 0.225                      | 0.669           | <b>19.649</b>              | <b>&lt; 0.001</b> |
| Non-informed IG, 61.2%                         |                               |                 | -                          | -               | 0.073                      | 0.886           | <b>13.175</b>              | <b>&lt; 0.001</b> |
| <b>Anonymous condition</b>                     |                               |                 |                            |                 |                            |                 |                            |                   |
| Informed IG, 63.0%                             |                               |                 |                            |                 | -                          | -               | <b>13.589</b>              | <b>&lt; 0.001</b> |
| Non-informed IG, 35.9%                         |                               |                 |                            |                 |                            |                 | -                          | -                 |
| <b>Zero</b>                                    | <b>125.5</b>                  | <b>&lt;.001</b> | <b>102.3</b>               | <b>&lt;.001</b> | <b>84.70</b>               | <b>&lt;.001</b> | <b>40.21</b>               | <b>&lt;.001</b>   |

**Table S3.3, 7:3 proposal**

| Proposer, 7 yuan                               | Experimenter condition |                 |                 |                 | Anonymous condition |                 |                 |                 |
|------------------------------------------------|------------------------|-----------------|-----------------|-----------------|---------------------|-----------------|-----------------|-----------------|
| Responder, 3 yuan                              | Informed IG            |                 | Non-informed IG |                 | Informed IG         |                 | Non-informed IG |                 |
| Total number of participants                   | 127                    |                 | 116             |                 | 92                  |                 | 92              |                 |
| No. and % of participants who reject the offer | 73<br>57.5%            |                 | 62<br>53.4%     |                 | 52<br>56.5%         |                 | 33<br>35.9%     |                 |
| $\chi^2$ -test                                 | $\chi^2$               | <i>p</i>        | $\chi^2$        | <i>p</i>        | $\chi^2$            | <i>p</i>        | $\chi^2$        | <i>p</i>        |
| <b>Experimenter condition</b>                  |                        |                 |                 |                 |                     |                 |                 |                 |
| Informed IG, 57.5%                             | -                      | -               | 0.399           | 0.605           | 0.020               | 0.891           | <b>9.977</b>    | <b>0.002</b>    |
| Non-informed IG, 53.4%                         |                        |                 | -               | -               | 0.196               | 0.676           | <b>6.390</b>    | <b>0.012</b>    |
| <b>Anonymous condition</b>                     |                        |                 |                 |                 |                     |                 |                 |                 |
| Informed IG, 56.5%                             |                        |                 |                 |                 | -                   | -               | <b>7.894</b>    | <b>0.008</b>    |
| Non-informed IG, 35.9%                         |                        |                 |                 |                 |                     |                 | -               | -               |
| <b>Zero</b>                                    | <b>102.4</b>           | <b>&lt;.001</b> | <b>84.61</b>    | <b>&lt;.001</b> | <b>72.48</b>        | <b>&lt;.001</b> | <b>40.21</b>    | <b>&lt;.001</b> |

**Table S3.4, 6:4 proposal**

| Proposer, 6 yuan                               | Experimenter condition |                 |                 |                 | Anonymous condition |                 |                 |                 |
|------------------------------------------------|------------------------|-----------------|-----------------|-----------------|---------------------|-----------------|-----------------|-----------------|
| Responder, 4 yuan                              | Informed IG            |                 | Non-informed IG |                 | Informed IG         |                 | Non-informed IG |                 |
| Total number of participants                   | 127                    |                 | 116             |                 | 92                  |                 | 92              |                 |
| No. and % of participants who reject the offer | 43<br>33.9%            |                 | 36<br>31.0%     |                 | 25<br>27.2%         |                 | 15<br>16.3%     |                 |
| $\chi^2$ -test                                 | $\chi^2$               | <i>p</i>        | $\chi^2$        | <i>p</i>        | $\chi^2$            | <i>p</i>        | $\chi^2$        | <i>p</i>        |
| <b>Experimenter condition</b>                  |                        |                 |                 |                 |                     |                 |                 |                 |
| Informed IG, 33.9%                             | -                      | -               | 0.220           | 0.682           | 1.113               | 0.305           | <b>8.444</b>    | <b>0.005</b>    |
| Non-informed IG, 31.0%                         |                        |                 | -               | -               | 0.369               | 0.646           | <b>6.015</b>    | <b>0.015</b>    |
| <b>Anonymous condition</b>                     |                        |                 |                 |                 |                     |                 |                 |                 |
| Informed IG, 27.2%                             |                        |                 |                 |                 | -                   | -               | 3.194           | 0.07            |
| Non-informed IG, 16.3%                         |                        |                 |                 |                 |                     |                 | -               | -               |
| <b>Zero</b>                                    | <b>51.76</b>           | <b>&lt;.001</b> | <b>42.61</b>    | <b>&lt;.001</b> | <b>28.93</b>        | <b>&lt;.001</b> | <b>16.33</b>    | <b>&lt;.001</b> |

**Table S3.5, 5:5 proposal**

| Proposer, <b>5 yuan</b>                        | <b>Experimenter condition</b> |                 |                            |                 | <b>Anonymous condition</b> |                 |                            |                 |
|------------------------------------------------|-------------------------------|-----------------|----------------------------|-----------------|----------------------------|-----------------|----------------------------|-----------------|
| Responder, <b>5 yuan</b>                       | Informed IG                   |                 | Non-informed IG            |                 | Informed IG                |                 | Non-informed IG            |                 |
| Total number of participants                   | 127                           |                 | 116                        |                 | 92                         |                 | 92                         |                 |
| No. and % of participants who reject the offer | 14<br>11.0%                   |                 | 21<br>18.1%                |                 | 9<br>9.8%                  |                 | 7<br>7.6%                  |                 |
| <b><math>\chi^2</math> -test</b>               | <b><math>\chi^2</math></b>    | <b><i>p</i></b> | <b><math>\chi^2</math></b> | <b><i>p</i></b> | <b><math>\chi^2</math></b> | <b><i>p</i></b> | <b><math>\chi^2</math></b> | <b><i>p</i></b> |
| <b>Experimenter condition</b>                  |                               |                 |                            |                 |                            |                 |                            |                 |
| Informed IG, 11.0%                             | -                             | -               | 2.465                      | 0.144           | 0.087                      | 0.826           | 0.718                      | 0.489           |
| Non-informed IG, 18.1%                         |                               |                 | -                          | -               | 2.878                      | 0.112           | <b>4.851</b>               | <b>0.039</b>    |
| <b>Anonymous condition</b>                     |                               |                 |                            |                 |                            |                 |                            |                 |
| Informed IG, 9.8%                              |                               |                 |                            |                 | -                          | -               | 0.274                      | 0.798           |
| Non-informed IG, 7.6%                          |                               |                 |                            |                 |                            |                 | -                          | -               |
| <b>Zero</b>                                    | <b>14.82</b>                  | <b>&lt;.001</b> | <b>23.09</b>               | <b>&lt;.001</b> | <b>9.463</b>               | <b>0.013</b>    | <b>7.277</b>               | <b>0.014</b>    |

**Table S3.6, 4:6 proposal**

| Proposer, <b>4 yuan</b>                        | <b>Experimenter condition</b> |                 |                            |                 | <b>Anonymous condition</b> |                 |                            |                 |
|------------------------------------------------|-------------------------------|-----------------|----------------------------|-----------------|----------------------------|-----------------|----------------------------|-----------------|
| Responder, <b>6 yuan</b>                       | Informed IG                   |                 | Non-informed IG            |                 | Informed IG                |                 | Non-informed IG            |                 |
| Total number of participants                   | 127                           |                 | 116                        |                 | 92                         |                 | 92                         |                 |
| No. and % of participants who reject the offer | 29<br>22.8%                   |                 | 25<br>21.6%                |                 | 16<br>17.4%                |                 | 16<br>17.4%                |                 |
| <b><math>\chi^2</math> -test</b>               | <b><math>\chi^2</math></b>    | <b><i>p</i></b> | <b><math>\chi^2</math></b> | <b><i>p</i></b> | <b><math>\chi^2</math></b> | <b><i>p</i></b> | <b><math>\chi^2</math></b> | <b><i>p</i></b> |
| <b>Experimenter condition</b>                  |                               |                 |                            |                 |                            |                 |                            |                 |
| Informed IG, 22.8%                             | -                             | -               | 0.058                      | 0.878           | 0.968                      | 0.398           | 0.968                      | 0.398           |
| Non-informed IG, 21.6%                         |                               |                 | -                          | -               | 0.561                      | 0.487           | 0.561                      | 0.487           |
| <b>Anonymous condition</b>                     |                               |                 |                            |                 |                            |                 |                            |                 |
| Informed IG, 17.4%                             |                               |                 |                            |                 | -                          | -               | 0.000                      | 1.000           |
| Non-informed IG, 17.4%                         |                               |                 |                            |                 |                            |                 | -                          | -               |
| <b>Zero</b>                                    | <b>32.74</b>                  | <b>&lt;.001</b> | <b>28.02</b>               | <b>&lt;.001</b> | <b>17.52</b>               | <b>&lt;.001</b> | <b>17.52</b>               | <b>&lt;.001</b> |

**Table S3.7, 3:7 proposal**

| Proposer, <b>3 yuan</b>                        | <b>Experimenter condition</b> |                 |                            |                 | <b>Anonymous condition</b> |                 |                            |                 |
|------------------------------------------------|-------------------------------|-----------------|----------------------------|-----------------|----------------------------|-----------------|----------------------------|-----------------|
| Responder, <b>7 yuan</b>                       | Informed IG                   |                 | Non-informed IG            |                 | Informed IG                |                 | Non-informed IG            |                 |
| Total number of participants                   | 127                           |                 | 116                        |                 | 92                         |                 | 92                         |                 |
| No. and % of participants who reject the offer | 38<br>29.9%                   |                 | 40<br>34.5%                |                 | 25<br>27.2%                |                 | 21<br>22.8%                |                 |
| <b><math>\chi^2</math> -test</b>               | <b><math>\chi^2</math></b>    | <b><i>p</i></b> | <b><math>\chi^2</math></b> | <b><i>p</i></b> | <b><math>\chi^2</math></b> | <b><i>p</i></b> | <b><math>\chi^2</math></b> | <b><i>p</i></b> |
| <b>Experimenter condition</b>                  |                               |                 |                            |                 |                            |                 |                            |                 |
| Informed IG, 29.9%                             | -                             | -               | 0.579                      | 0.493           | 0.197                      | 0.763           | 1.365                      | 0.281           |
| Non-informed IG, 34.5%                         |                               |                 | -                          | -               | 1.276                      | 0.293           | 3.364                      | 0.091           |
| <b>Anonymous condition</b>                     |                               |                 |                            |                 |                            |                 |                            |                 |
| Informed IG, 27.2%                             |                               |                 |                            |                 | -                          | -               | 0.464                      | 0.610           |
| Non-informed IG, 22.8%                         |                               |                 |                            |                 |                            |                 | -                          | -               |
| <b>Zero</b>                                    | <b>44.69</b>                  | <b>&lt;.001</b> | <b>48.33</b>               | <b>&lt;.001</b> | <b>28.93</b>               | <b>&lt;.001</b> | <b>23.71</b>               | <b>&lt;.001</b> |

**Table S3.8, 2:8 proposal**

| Proposer, <b>2 yuan</b>                        | <b>Experimenter condition</b> |                 |                            |                 | <b>Anonymous condition</b> |                 |                            |                 |
|------------------------------------------------|-------------------------------|-----------------|----------------------------|-----------------|----------------------------|-----------------|----------------------------|-----------------|
| Responder, <b>8 yuan</b>                       | Informed IG                   |                 | Non-informed IG            |                 | Informed IG                |                 | Non-informed IG            |                 |
| Total number of participants                   | 127                           |                 | 116                        |                 | 92                         |                 | 92                         |                 |
| No. and % of participants who reject the offer | 44<br>34.6%                   |                 | 43<br>37.1%                |                 | 25<br>27.2%                |                 | 22<br>23.9%                |                 |
| <b><math>\chi^2</math> -test</b>               | <b><math>\chi^2</math></b>    | <b><i>p</i></b> | <b><math>\chi^2</math></b> | <b><i>p</i></b> | <b><math>\chi^2</math></b> | <b><i>p</i></b> | <b><math>\chi^2</math></b> | <b><i>p</i></b> |
| <b>Experimenter condition</b>                  |                               |                 |                            |                 |                            |                 |                            |                 |
| Informed IG, 34.6%                             | -                             | -               | 0.155                      | 0.789           | 1.380                      | 0.302           | 2.919                      | 0.102           |
| Non-informed IG, 37.1%                         |                               |                 | -                          | -               | 2.283                      | 0.140           | 4.133                      | 0.050           |
| <b>Anonymous condition</b>                     |                               |                 |                            |                 |                            |                 |                            |                 |
| Informed IG, 27.2%                             |                               |                 |                            |                 | -                          | -               | 0.257                      | 0.736           |
| Non-informed IG, 23.9%                         |                               |                 |                            |                 |                            |                 | -                          | -               |
| <b>Zero</b>                                    | <b>53.22</b>                  | <b>&lt;.001</b> | <b>52.78</b>               | <b>&lt;.001</b> | <b>28.93</b>               | <b>&lt;.001</b> | <b>24.99</b>               | <b>&lt;.001</b> |

**Table S3.9, 1:9 proposal**

| Proposer, <b>1 yuan</b>                        | <b>Experimenter condition</b> |                 |                            |                 | <b>Anonymous condition</b> |                 |                            |                 |
|------------------------------------------------|-------------------------------|-----------------|----------------------------|-----------------|----------------------------|-----------------|----------------------------|-----------------|
| Responder, <b>9 yuan</b>                       | Informed IG                   |                 | Non-informed IG            |                 | Informed IG                |                 | Non-informed IG            |                 |
| Total number of participants                   | 127                           |                 | 116                        |                 | 92                         |                 | 92                         |                 |
| No. and % of participants who reject the offer | 41<br>32.3%                   |                 | 50<br>43.1%                |                 | 29<br>31.5%                |                 | 24<br>26.1%                |                 |
| <b><math>\chi^2</math> -test</b>               | <b><math>\chi^2</math></b>    | <b><i>p</i></b> | <b><math>\chi^2</math></b> | <b><i>p</i></b> | <b><math>\chi^2</math></b> | <b><i>p</i></b> | <b><math>\chi^2</math></b> | <b><i>p</i></b> |
| <b>Experimenter condition</b>                  |                               |                 |                            |                 |                            |                 |                            |                 |
| Informed IG, 32.3%                             | -                             | -               | 3.030                      | 0.086           | 0.014                      | 1.000           | 0.982                      | 0.370           |
| Non-informed IG, 43.1%                         |                               |                 | -                          | -               | 2.922                      | 0.113           | 6.842                      | 0.013           |
| <b>Anonymous condition</b>                     |                               |                 |                            |                 |                            |                 |                            |                 |
| Informed IG, 31.5%                             |                               |                 |                            |                 | -                          | -               | 0.663                      | 0.515           |
| Non-informed IG, 26.1%                         |                               |                 |                            |                 |                            |                 | -                          | -               |
| <b>Zero</b>                                    | <b>48.89</b>                  | <b>&lt;.001</b> | <b>63.74</b>               | <b>&lt;.001</b> | <b>34.43</b>               | <b>&lt;.001</b> | <b>27.60</b>               | <b>&lt;.001</b> |
